# Supplementary material for: Pediatric trauma primary survey performance among surgical and non-surgical pediatric providers in a Brazilian trauma center
Source: PubMed Central journal article supplement — Trauma Surg Acute Care Open. 2020 Jul 21;5(1):e000451. doi: 10.1136/tsaco-2020-000451 (PMC7375395; doi:10.1136/tsaco-2020-000451), 2020-07-21
Supplement: tsaco-2020-000451supp001.pdf [file tsaco-2020-000451supp001.pdf]

## Supplementary File 1 - Observer Checklist:

|                                 |                                                                                                            |
|---------------------------------|------------------------------------------------------------------------------------------------------------|
| Demography and Epidemiology     | Date and Time                                                                                              |
|                                 | Age                                                                                                        |
|                                 | Gender                                                                                                     |
|                                 | Mechanism of Trauma                                                                                        |
|                                 | Main provider specialty                                                                                    |
| Airway                          | Protection of cervical spine (either manual stabilization or application of cervical collar) - (yes or no) |
|                                 | Deliver oxygen (yes or no)                                                                                 |
|                                 | Oximetry (yes or no). Value:                                                                               |
|                                 | <u>Previously intubated</u> (yes or no)                                                                    |
| Breathing                       | Measurement of respiratory rate (yes or no)                                                                |
|                                 | Respiratory rate:                                                                                          |
|                                 | Thoracic X-Ray (yes or no)                                                                                 |
|                                 | Chest tube inserted (yes or no)                                                                            |
| Circulation                     | Measurement of heart rate (yes or no)                                                                      |
|                                 | Heart Rate:                                                                                                |
|                                 | Measurement of blood pressure (yes or no)                                                                  |
|                                 | Blood pressure:                                                                                            |
|                                 | Capillary refill assessment - (yes or no)                                                                  |
|                                 | Time of capillary refill:                                                                                  |
|                                 | FAST exam - (yes or no)                                                                                    |
|                                 | Pelvic X-Ray - (yes or no)                                                                                 |
| IV fluids started - (yes or no) |                                                                                                            |

|                         |                                                                 |
|-------------------------|-----------------------------------------------------------------|
|                         | Blood started - (yes or no)                                     |
| Disability              | Evaluation of Glasgow Coma Scale (GCS) (yes or no)              |
|                         | GCS:                                                            |
| Exposure                | Examination of patient's back (yes or no)                       |
|                         | Protection against Hypothermia (yes or no)                      |
| Other                   | Measurement of weight or use of Broselow tape                   |
| Diagnosis and Treatment | Final Diagnosis                                                 |
|                         | Other imaging studies (specify kind of study and date of study) |
|                         | Length of staying                                               |
|                         | PICU (yes or no)                                                |
|                         | Surgery (yes or no). Kind of surgery and date                   |
|                         | Mortality (yes or no).                                          |
